# Supplementary material for: Irf6 directly regulates Klf17 in zebrafish periderm and Klf4 in murine oral epithelium, and dominant-negative KLF4 variants are present in patients with cleft lip and palate
Source: PubMed Central journal article supplement — Hum Mol Genet. 2015 Dec 21;25(4):766–76. doi: 10.1093/hmg/ddv614 (PMC4743694; doi:10.1093/hmg/ddv614), 2015-12-21

## SUPPLEMENTAL MATERIAL

### Supplemental figures

**Figure S1.** Dual luciferase assay validates two IRF6 binding sites in 2.2kb upstream of zebrafish Klf17. Asterisks indicate significant difference between IRF6 overexpression group and control plasmid-transfected group, \*\*:  $P < 0.01$ ; plus marks indicate significant difference between Klf17 promoter lacking either IRF6 binding sites and intact promoter, ++:  $P < 0.01$ .

**Figure S2.** Chromatin Conformation Capture using KLF4-E1 as bait showing KLF4-E2~E5 can physically crosstalk with KLF4-E1.

**Figure S3.** GFP reporter transgenic fish showing enhancer activity of KLF4-E5 in oral epithelium (lateral and ventral view)

**Figure S4.** Pedigrees of other families with KLF4 mutation p.R94G. Only proband was sequenced.

### Supplemental tables

**Table S1.** Intersection between NHEK super-enhancers and IRF6 ChIP-seq peaks.

**Table S2.** Summary of KLF4 variants found in NSCL/P patients.

**Table S3** Common variant association statistics in Filipino multiplex families

| Marker      | Alleles | Minor Allele (Freq) | # Informative Families | Z     | P     |
|-------------|---------|---------------------|------------------------|-------|-------|
| rs2236599   | G/A     | A (0.238)           | 98                     | 0.655 | 0.512 |
| rs149109998 | G/A     | A (0.035)           | 29                     | 1.205 | 0.228 |
| rs77275043  | C/G     | C (0.212)           | 97                     | 0.560 | 0.575 |

**Table S4.** Rare variant statistics for KLF4 (p-values, MAF < 0.01)

| Testing Method    | All Coding Variants |       | All Missense Variants |                 |
|-------------------|---------------------|-------|-----------------------|-----------------|
|                   | CLP                 | CLO   | CLP                   | CLO             |
| Burden Tests:     |                     |       |                       |                 |
| CAST              | 0.407               | 0.636 | 0.058                 | 0.424           |
| VT                | 0.074               | 0.318 | 0.071                 | -- <sup>a</sup> |
| Non-burden Tests: |                     |       |                       |                 |
| RBT               | 0.152               | 0.507 | <b>0.026</b>          | 0.093           |
| C-alpha           | 0.525               | 0.851 | 0.362                 | 0.591           |

<sup>a</sup> Insufficient observations

Bold, nominally significant p-value.

**Table S5** Sequence of primers used in this study.

# Supplemental Figure 1

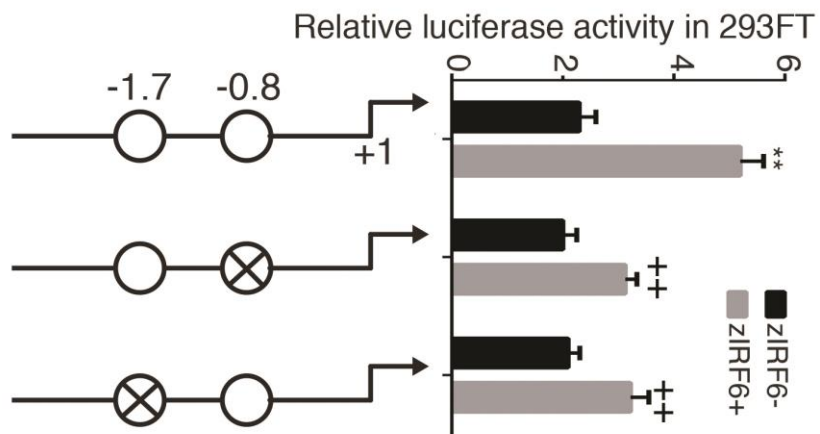

## Supplemental Figure 2

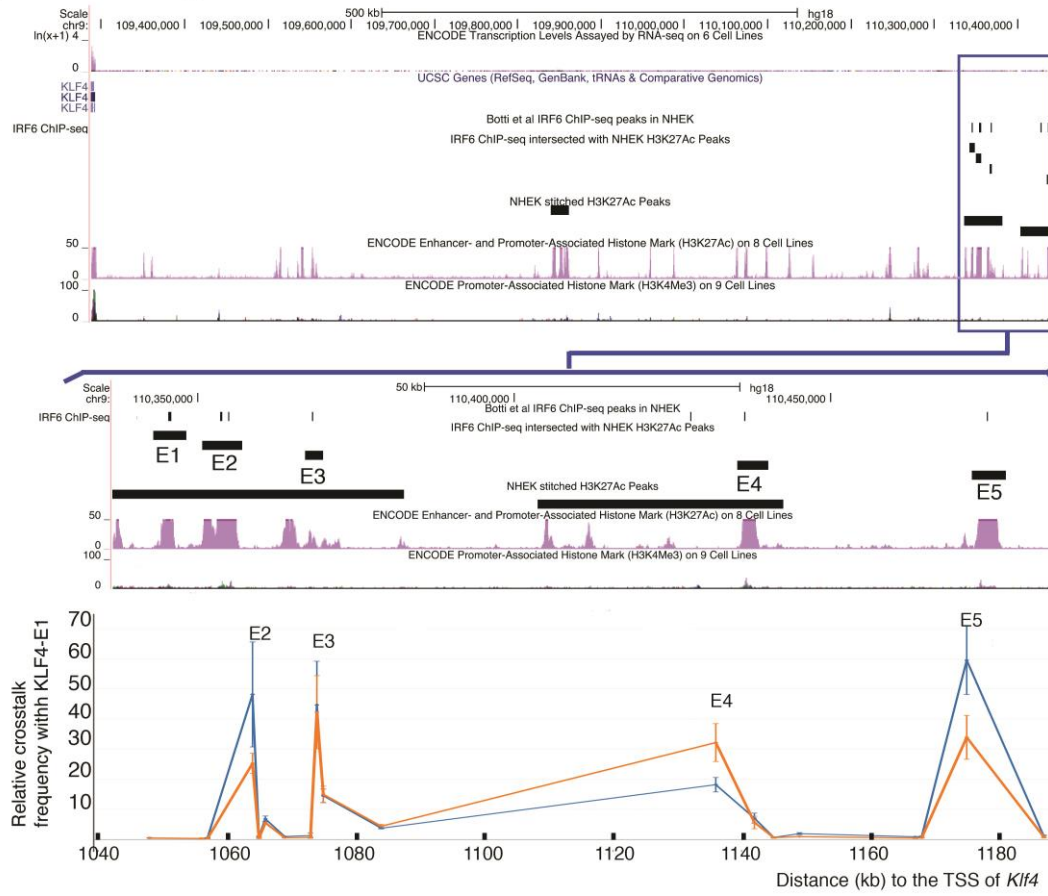

## Supplemental Figure 3

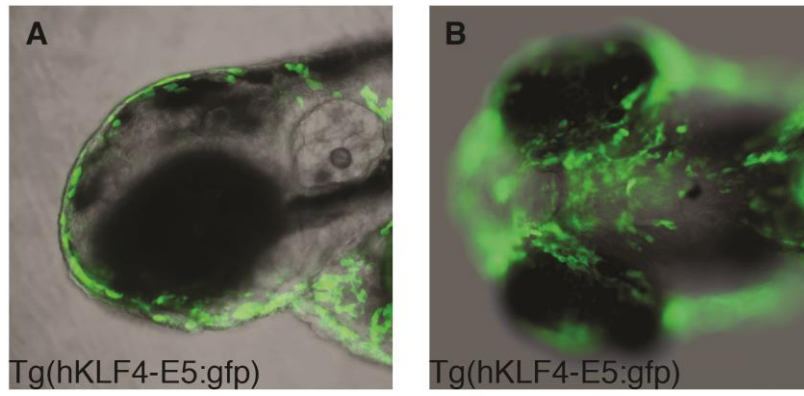

# Supplemental Figure 4

p.R94G

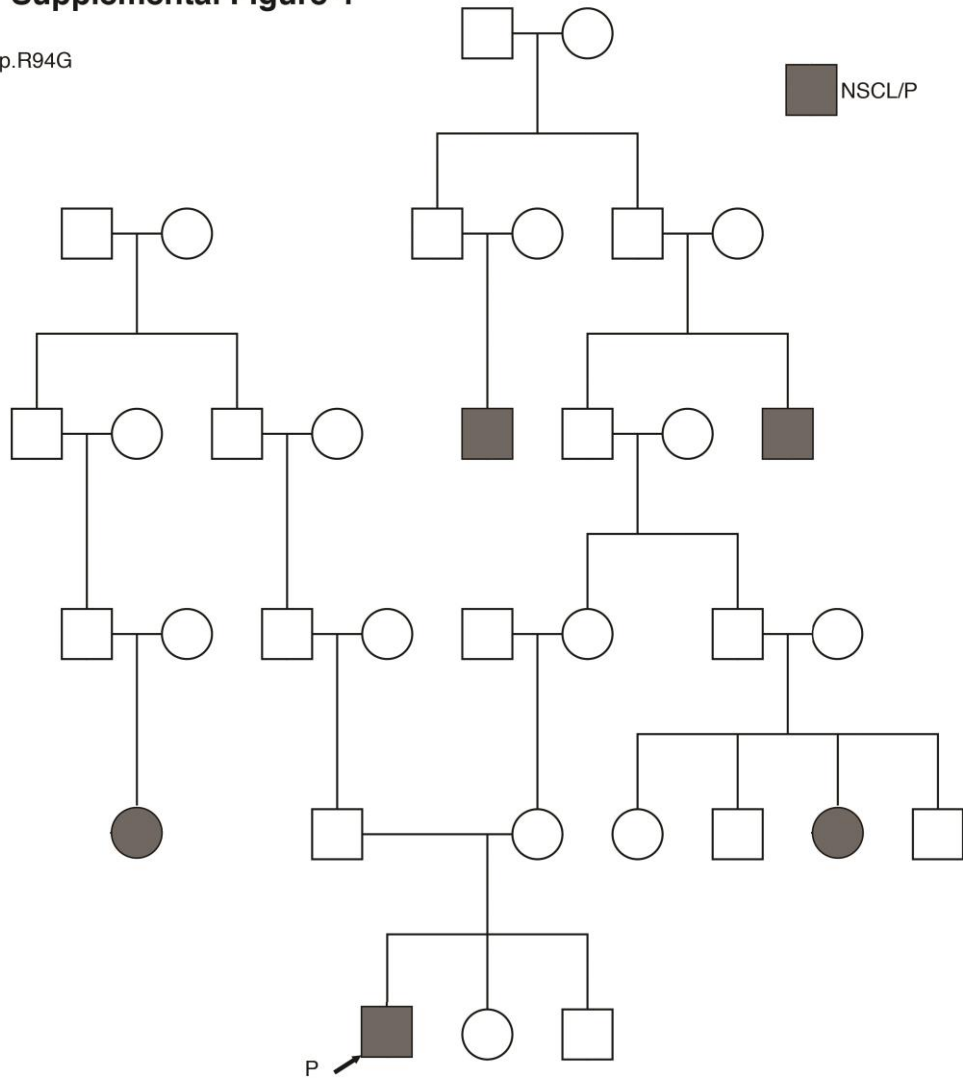

Supplement: supp_ddv614_ddv614supp.pdf [file supp_ddv614_ddv614supp.pdf]
